# Supplementary material for: Ligand strain and conformations in a family of Fe(ii) spin crossover hexadentate complexes involving the 2-pyridylmethyl-amino moiety: DFT modelling
Source: Royal Society of Chemistry journal article supplement (doi:10.1039/c3cp44570d), 2013-01-01
Supplement: c3cp44570d.pdf [file c3cp44570d.pdf]

Experimental and calculated bond distances for TPSSh/TZVP method using CPM method with water as solvent

LS systems

| Bond distance                  | (66) exp | (66) calc | (56) exp | (56) calc | (55) exp | (55) calc |
|--------------------------------|----------|-----------|----------|-----------|----------|-----------|
| Fe(1)–N(1) NH <sub>fac</sub>   | 2.009(5) |           | 2.020(3) |           | 2.020(2) |           |
|                                |          | 2.047     |          | 2.052     |          | 2.050     |
| Fe(1)–N(2) N <sub>centr</sub>  | 2.128(4) |           | 2.047(3) |           | 2.004(2) |           |
|                                |          | 2.103     |          | 2.059     |          | 2.022     |
| Fe(1)–N(3) NH <sub>mer</sub>   | 2.085(6) |           | 1.969(4) |           | 1.989(2) |           |
|                                |          | 2.053     |          | 2.048     |          | 2.006     |
| Fe(1)–N(4) py <sub>centr</sub> | 2.049(4) |           | 1.964(3) |           | 1.973(2) |           |
|                                |          | 1.986     |          | 1.973     |          | 1.982     |
| Fe(1)–N(5) py <sub>fac</sub>   | 2.033(5) |           | 1.999(3) |           | 1.984(2) |           |
|                                |          | 1.993     |          | 2.004     |          | 2.001     |
| Fe(1)–N(6) py <sub>mer</sub>   | 2.061(4) |           | 1.997(3) |           | 1.974(2) |           |
|                                |          | 1.997     |          | 2.004     |          | 1.988     |

HS systems

| Bond distance                  | (66) exp <sup>a</sup> | (66) calc | (56) calc | (55) calc |
|--------------------------------|-----------------------|-----------|-----------|-----------|
| Fe(1)–N(1) NH <sub>fac</sub>   | 2.208(3)              |           |           |           |
|                                |                       | 2.240     | 2.255     | 2.254     |
| Fe(1)–N(2) N <sub>centr</sub>  | 2.238(2)              |           |           |           |
|                                |                       | 2.297     | 2.253     | 2.244     |
| Fe(1)–N(3) NH <sub>mer</sub>   | 2.151/2.217(4)        |           |           |           |
|                                |                       | 2.218     | 2.217     | 2.231     |
| Fe(1)–N(4) py <sub>centr</sub> | 2.181(2)              |           |           |           |
|                                |                       | 2.202     | 2.193     | 2.204     |
| Fe(1)–N(5) py <sub>fac</sub>   | 2.191(2)              |           |           |           |
|                                |                       | 2.204     | 2.220     | 2.201     |
| Fe(1)–N(6) py <sub>mer</sub>   | 2.235(2)              |           |           |           |
|                                |                       | 2.277     | 2.198     | 2.164     |
